# Supplementary material for: Exploring the behavioral intentions of PICC-related thrombosis prevention in breast cancer patients undergoing chemotherapy: a qualitative study based on theory of planned behavior
Source: Research Square preprint supplement (doi:10.21203/rs.3.rs-4191528/v1), 2024-04-09
Supplement: Supplementary file 1 [file d4debe22633efecafd6f1c9a.docx]

**Consolidated criteria for reporting qualitative studies (COREQ): 32-item checklist**

| **No.** | **Item** | **Guide questions/ description** | **Checklist of this study** |
| --- | --- | --- | --- |
| **Domain 1: Research team and reflexivity** | | | |
| **Personal Characteristics** | | | |
| 1. | Interviewer/facilitator | Which author/s conducted the interview or focus group? | ZN, XYand WXJ. |
| 2. | Credentials | What were the researcher’s credentials? E.g. PhD, MD | ZN was a postgraduate student majoring in nursing at that time, XY was a supervisor nurse and WXJ was a professor. |
| 3. | Occupation | What was their occupation at the time of the study? | ZN was a graduate nursing student, XY and WXJ were head nurses. |
| 4. | Gender | Was the researcher male or female? | All the interviewers were female. |
| 5. | Experience and training | What experience or training did the researcher have? | They all learned qualitative study methods in schools and had the experiences of carrying out interviews, while XY and WXJ had published relevant articles before. |
| **Relationship with participants** | | | |
| 6. | Relationship established | Was a relationship established prior to study commencement? | Yes. ZN graduate nursing student who had interned in the hospital, participants were familiar with them and a trust relationship had been established between the interviewers and participants during hospitalization. XY was the head nurse of the Health Care Department, and previously worked as a teaching teacher in the Department of Orthopedics, contributed to the formulation of the interview guide. WXJ was the head nurse of the day ward and previously a teaching teacher in breast surgery, contributed to the formulation of the interview guide and the conditions for the interview. |
| 7. | Participant knowledge of the interviewer | What did the participants know about the researcher? e.g. personal goals, reasons for doing the research | Participants get to know researchers during daily nursing rounds, a trust relationship had been established between the interviewers and participants during hospitalization.They also fully understand reasons of this research. |
| 8. | Interviewer characteristics | What characteristics were reported about the interviewer/facilitator? e.g. Bias, assumptions, reasons and interests in the research topic | The interviewers held no assumptions about the research topic. |
| **Domain 2: study design** | | | |
| **Theoretical framework** | | | |
| 9. | Methodological orientation and Theory | What methodological orientation was stated to underpin the study? e.g. grounded theory, discourse analysis, ethnography, phenomenology, content analysis | It was a phenomenological descriptive qualitative study,The interview guide was designed based on Theory of Planned Behavior. Colaizzi's descriptive analysis framework was used to analyze data. |
| **Participant selection** | | | |
| 10. | Sampling | How were participants selected? e.g. purposive, convenience, consecutive, snowball | Purposive. |
| 11. | Method of approach | How were participants approached? e.g. face-to-face, telephone, mail, email | Face-to-face. |
| 12. | Sample size | How many participants were in the study? | 14 breast cancer patients undergoing chemotherapy. |
| 13. | Non-participation | How many people refused to participate or dropped out? Reasons? | 1 breast cancer patients undergoing chemotherapy withdrewed from the interview because she felt too uncomfortable (side effects of chemotherapy). |
| **Setting** | | | |
| 14. | Setting of data collection | Where was the data collected? e.g. home, clinic, workplace | Data was collected in a quiet and high-quality reception room in in the Department of Breast Surgery at a tertiary public hospital with more than 500 beds. |
| 15. | Presence of non-participants | Was anyone else present besides the participants and researchers? | No. |
| 16. | Description of sample | What are the important characteristics of the sample? e.g. demographic data, date | The demographic data, educational background, marital status, occupation type and duration of PICC catheterization (days) were reported. |
| **Data collection** | | | |
| 17. | Interview guide | Were questions, prompts, guides provided by the authors? Was it pilot tested? | Yes, the interview guide of this study was provided in in the part of “Methods”. It was pilot tested before formal interviews. |
| 18. | Repeat interviews | Were repeat interviews carried out? If yes, how many? | No repeat interview was carried out. |
| 19. | Audio/visual recording | Did the research use audio or visual recording to collect the data? | The audio recording was used to collect data. |
| 20. | Field notes | Were field notes made during and/or after the interview or focus group? | Field notes were made during the interview. |
| 21. | Duration | What was the duration of the interviews or focus group? | 20~30 minutes. |
| 22. | Data saturation | Was data saturation discussed? | Yes,data saturation was discussed in the part off “Participants and Setting”. |
| 23. | Transcripts returned | Were transcripts returned to participants for comment and/or correction? | Yes.When all analyses were complete, the three previous respondents were contacted by telephone to give feedback on the results to ensure the reliability and accuracy of the results. |
| **Domain 3: analysis and findings** | | | |
| **Data analysis** | | | |
| 24. | Number of data coders | How many data coders coded the data? | Three authors (ZN, XY, LQD and ZLY) coded the data. |
| 25. | Description of the coding tree | Did authors provide a description of the coding tree? | No,we did not provide a description of the coding tree, but we provided a figure to introduce all the themes and sub themes. |
| 26. | Derivation of themes | Were themes identified in advance or derived from the data? | Themes were directly derived from the theoretical framework content, but all themes and subthemes were derived from the data. |
| 27. | Software | What software, if applicable, was used to manage the data? | NVivo 12 was used for data analysis. |
| 28. | Participant checking | Did participants provide feedback on the findings? | The participants were agreed with the findings. |
| **Reporting** | | | |
| 29. | Quotations presented | Were participant quotations presented to illustrate the themes / findings? Was each quotation identified? e.g. participant number | Yes, the participant quotations were presented to illustrate the themes and each quotation was identified with participant number in the part of “Results”. |
| 30. | Data and findings consistent | Was there consistency between the data presented and the findings? | Yes, the data presented was consistent with the findings. |
| 31. | Clarity of major themes | Were major themes clearly presented in the findings? | Yes, the major themes were clearly presented in both graphical and textual descriptions in the part of “Results”. |
| 32. | Clarity of minor themes | Is there a description of diverse cases or discussion of minor themes? | Yes, there is a description of diverse cases in the part of “Results” and we discussed them in the part of “Discussion”. |
